# Supplementary material for: Heterogeneous catalytic ozonation of natural organic matter with goethite, cerium oxide and magnesium oxide
Source: Royal Society of Chemistry journal article supplement (doi:10.1039/c5ra21674e), 2016-01-01
Supplement: c5ra21674e1.pdf [file c5ra21674e1.pdf]

Supporting Information for

**Heterogeneous catalytic ozonation of natural organic matter with  
goethite, cerium oxide and magnesium oxide**

Qun Wang<sup>†,\*</sup>, Zhichao Yang<sup>†,‡</sup>, Bin Chai<sup>†</sup>, Shuang Cheng<sup>†</sup>, Xiaohui Lu<sup>†</sup>, Xiaofeng Bai<sup>†</sup>

<sup>†</sup>. *Faculty of Geosciences and Environmental Engineering, Southwest Jiaotong University, Chengdu  
610031, P.R. China;*

<sup>‡</sup>. *State Key Laboratory of Urban Water Resource and Environment, Harbin Institute of Technology,  
Harbin 150090, P.R. China.*

**This PDF file includes:**

4 Texts, 2 Figures and 1 Table are available for further information addressing experimental procedures, and additional data.

**\* To whom correspondence should be addressed.**

E-mail Address: [zcyang\\_swjtu@126.com](mailto:zcyang_swjtu@126.com)

Phone: +86-28-66367584.

Fax: +86-28-66367584.

## List of supporting materials

**Text S1.** Calculation of tert-butanol (TBA) dosage in the bulk solution

**Text S2.** The detailed information for batch experimental procedures

**Text S3.** The detailed information for evaluating the stability and recyclability of the catalysts

**Text S4.** Calculation of  $R_{ct}$  in the catalytic ozonation and single ozonation

**Figure S1.** Apparent first order kinetics for ATZ degradation in the catalytic ozonation and single ozonation

**Figure S2.** Comparison of XRD patterns of the catalysts before and after reactions

**Table S1.** The  $R_{ct}$  values in the catalytic ozonation and single ozonation

### **Text S1. Calculation of tert-butanol (TBA) dosage in the bulk solution**

TBA was used to capture HO· in the catalytic ozonation and single ozonation. The concentration of TBA should be in excess of the substrate (i.e., at least tenfold). It was calculated by Eq. (1) as showed below.

$$[TBA] = \frac{10 \sum k_i [s_i]}{k_{HO \cdot, TBA}} \quad (1)$$

where [TBA] represents the concentration of TBA;  $[s_i]$  represents the concentration of natural organic matter  $s_i$  in the filtered water;  $k_i$  represents the rate constant of the reaction between HO· and  $s_i$ ;  $k_{HO \cdot, TBA}$  represents the rate constant of the reaction between HO· and TBA.

$[s_i]$  can be calculated by [DOC], which is  $2.68 \text{ mg} \cdot \text{L}^{-1}$  as showed in Table 1.  $k_i \approx 2.5 \times 10^4 \text{ (mg} \cdot \text{L}^{-1})^{-1} \cdot \text{s}^{-1}$ ,  $k_{HO \cdot, TBA} = 5 \times 10^8 \text{ M}^{-1} \cdot \text{s}^{-1}$ , and then the concentration of TBA can be calculated to be  $1.34 \times 10^{-3} \text{ M}$ . Thus, 13.5 mM TBA was introduced into the reactor in the batch experiments.

### **Text S2. The detailed information for batch experimental procedures**

1 L of the water sample was added into the reactor followed by TBA solution (13.5 mM). In the catalytic ozonation, after addition of TBA solution, MgO, FeOOH or CeO<sub>2</sub> (0.1 g) was added into the reactor. 36.56 mL of aqueous ozone was introduced into the reactor after the saturated ozone concentration (ca.  $32 \text{ mg} \cdot \text{L}^{-1}$ ) reached. The reactor was then sealed and magnetically stirred. The samples withdrawn at predetermined intervals were filtered through 0.45- $\mu\text{m}$  glass fiber filters (Whatman) to remove the catalyst particles after the residual ozone has been quenched by pure nitrogen.

### **Text S3. The detailed information for evaluating the stability and recyclability of the catalysts**

Pre-experiments were needed to obtain the recycled catalysts. In the pre-experiments, after the dose of  $2 \mu\text{M}$  atrazine solution, a large amount of the catalysts (ca. 3g) was introduced into the reactors to avoid the insufficient of the catalysts in the subsequent runs due to the loss of the catalysts during reclamation processes. And then, 36.56 mL of aqueous ozone was introduced into the reactor after the saturated ozone concentration (ca.  $32 \text{ mg} \cdot \text{L}^{-1}$ ) reached. The reactor was then sealed and magnetically stirred. After 20 min, the catalysts were reclaimed by filtration through glass fiber filters and rinsed with methanol and Milli-Q water several times. And then, the catalysts were dried at  $70 \text{ }^\circ\text{C}$  for 12 h. The reclaimed catalysts were divided into two parts. 100 mg of the catalysts was taken out to be used in the second run and the residual catalysts were used and reclaimed again according to the above steps. And then, the catalysts for the third, fourth and fifth run were obtained, respectively. The fresh catalysts were used as catalysts in the first run, and the reclaimed particles were used as catalysts in the second, third, fourth and fifth run. In these runs, the samples withdrawn at predetermined intervals were filtered through 0.45- $\mu\text{m}$  glass fiber filters (Whatman) to remove the catalyst particles after the residual ozone has been quenched by pure nitrogen.

#### Text S4. Calculation of $R_{ct}$ in the catalytic ozonation and single ozonation

The  $R_{ct}$  is defined as the ratio of the exposures of HO radicals and ozone. The exposures  $O_3$ -ct and HO-ct are the integrals of concentration ( $O_3$  or HO·) vs. time plots. The calculation is described in Eq. (S1).

$$R_{ct} = \frac{\int [HO\cdot] dt}{\int [O_3] dt} \quad (S1)$$

The integral of  $O_3$  concentration vs time plots corresponds to the area under this curve. The integral of HO· concentration vs time plots can be determined by measuring the decrease of atrazine (ATZ). The rate constants  $k_{O_3,ATZ}$  and  $k_{HO,ATZ}$  were found to be  $6.0 \text{ M}^{-1}\cdot\text{s}^{-1}$  and  $3 \times 10^9 \text{ M}^{-1}\cdot\text{s}^{-1}$ , respectively. And thus, the degradation of ATZ can be calculated as described in Eq. (S2).

$$\frac{d[ATZ]}{dt} = k_{O_3,ATZ} [ATZ][O_3] + k_{HO,ATZ} [ATZ][HO\cdot] \quad (S2)$$

Eq. (S2) can be rewritten as:

$$\ln \frac{[ATZ]}{[ATZ]_0} = - \left( \int k_{O_3,ATZ} [O_3] dt + \int k_{HO,ATZ} [HO\cdot] dt \right) \quad (S3)$$

After further simplify, Eq. (S4) can be obtained by substituting Eq. (S1) into Eq. (S3):

$$\ln \frac{[ATZ]}{[ATZ]_0} = - \left( k_{O_3,ATZ} + k_{HO,ATZ} \cdot R_{ct} \right) \int [O_3] dt \quad (S4)$$

And thus, the  $R_{ct}$  value can be calculated as Eq. (S5):

$$R_{ct} = \frac{\left( \ln \frac{[ATZ]}{[ATZ]_0} \right)}{\int [O_3] dt + k_{O_3,ATZ}} \quad (S5)$$

The first item of the denominator is the slope of the curve  $\left( \ln \frac{[ATZ]}{[ATZ]_0} \right)$  vs.  $\int [O_3] dt$ .

Combined with Fig. S1, the  $R_{ct}$  values in the catalytic ozonation and single ozonation are summarized in Table S1.

**Fig. S1. Apparent first order kinetics for ATZ degradation in the catalytic ozonation and single ozonation**

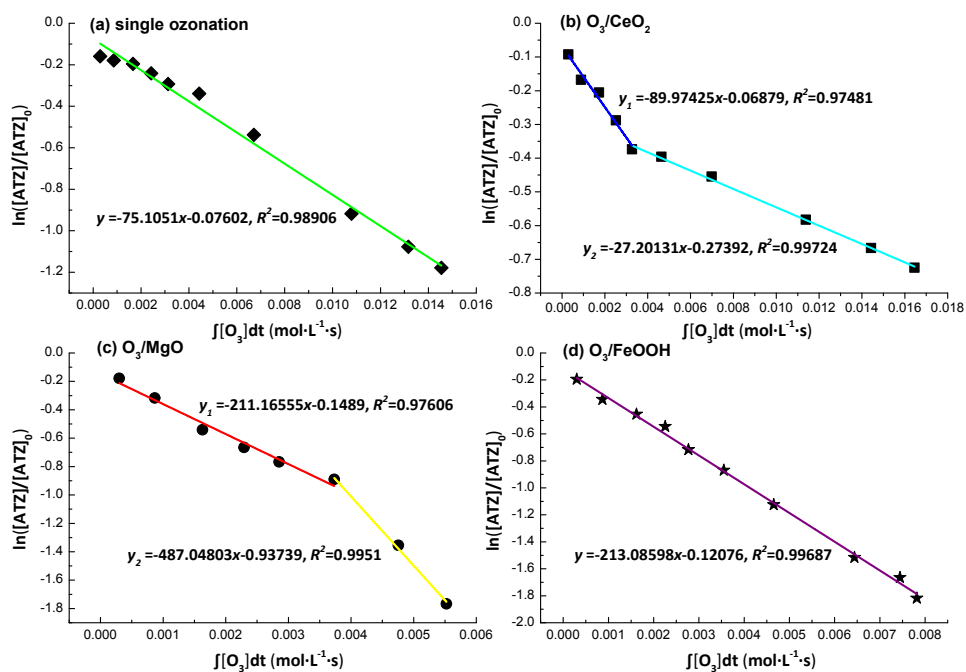

Fig. S1. Apparent first order kinetics for ATZ degradation in (a) single ozonation, (b) CeO<sub>2</sub> catalytic ozonation, (c) MgO catalytic ozonation and (d) FeOOH catalytic ozonation. Catalyst dose= 100 mg·L<sup>-1</sup>, T= 20 °C, pH= 7.53, [O<sub>3</sub>]<sub>0</sub>= 1.17 ± 0.03 mg·L<sup>-1</sup>, [ATZ]<sub>0</sub>= 2 μm, reaction time = 20 min.

Figure S2. Comparison of XRD patterns of the catalysts before and after reactions

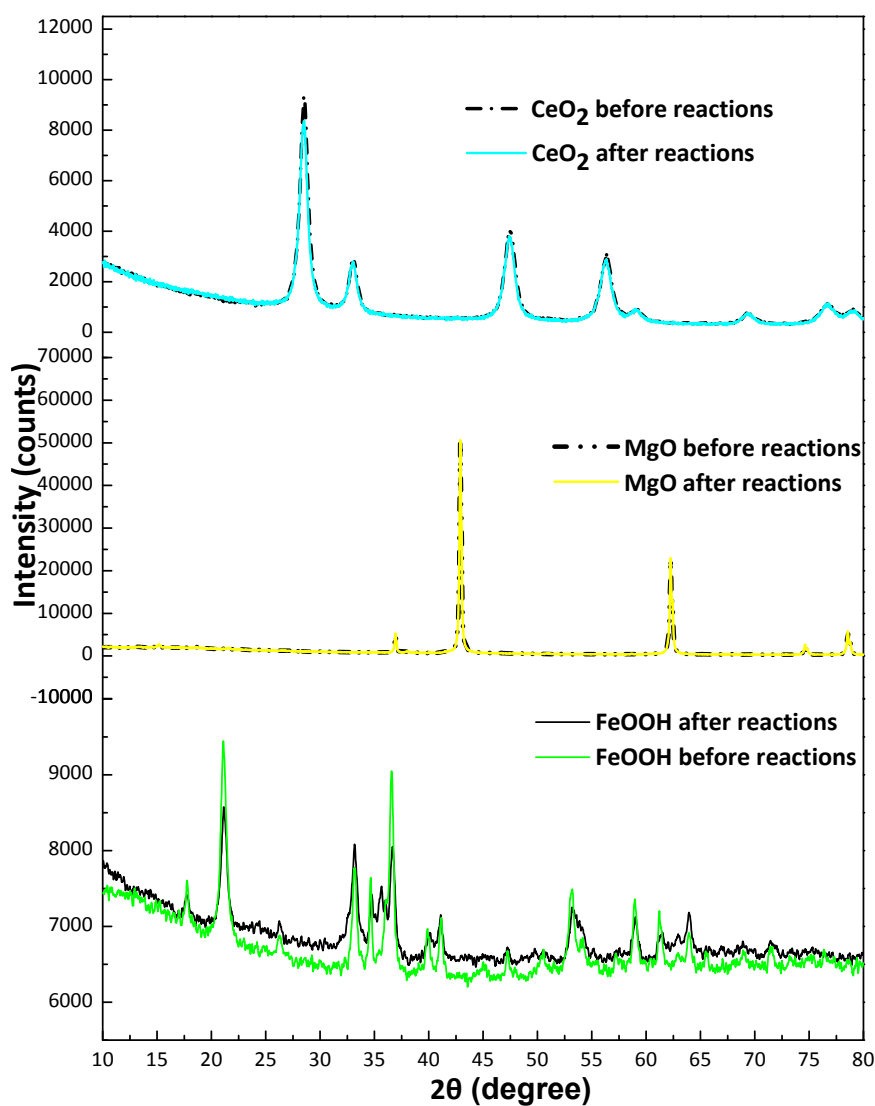

Fig. S2 Comparison of XRD patterns of the catalysts before and after reactions

Table S1. The  $R_{ct}$  values in the catalytic ozonation and single ozonation

Table S1. The  $R_{ct}$  values in the catalytic ozonation and single ozonation

| Processes                            | $R_{ct}$ values          |                         |
|--------------------------------------|--------------------------|-------------------------|
|                                      | The first phase          | The second phase        |
| Single ozonation                     | $2.3035 \times 10^{-8}$  |                         |
| CeO <sub>2</sub> catalytic ozonation | $2.7991 \times 10^{-8}$  | $7.0671 \times 10^{-9}$ |
| MgO catalytic ozonation              | $6.83885 \times 10^{-8}$ | $1.6035 \times 10^{-7}$ |
| FeOOH catalytic ozonation            | $6.90287 \times 10^{-8}$ |                         |
